# Supplementary material for: Viscoelasticity of dense suspensions of thermosensitive microgel mixtures undergoing colloidal gelation
Source: Royal Society of Chemistry journal article supplement (doi:10.1039/c7sm02411h), 2018-01-01
Supplement: c7sm02411h1.pdf [file c7sm02411h1.pdf]

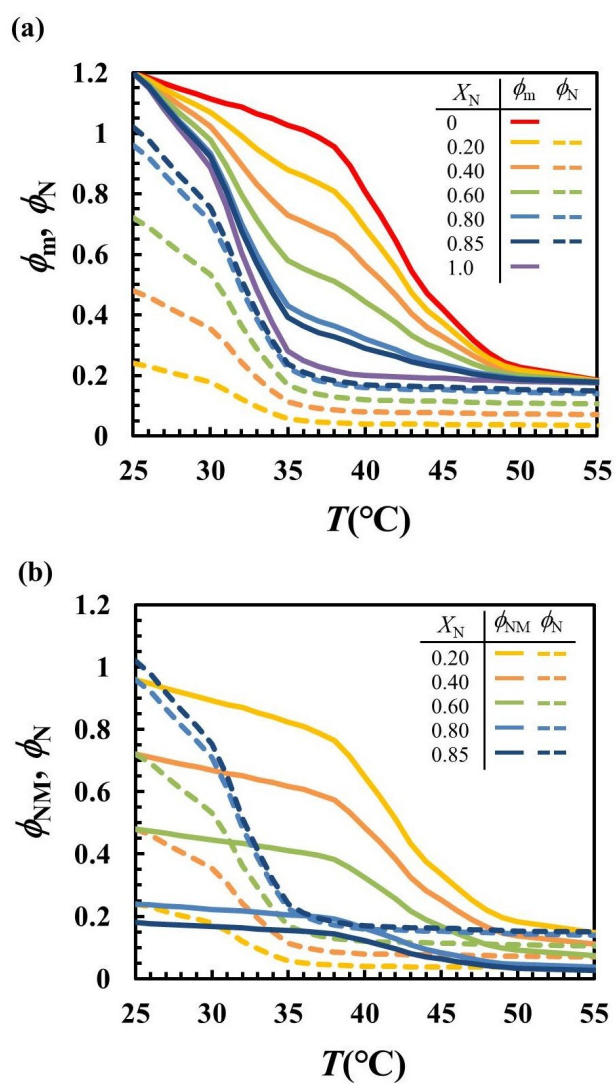

**Supporting Information 1.**  $T$ -dependence of (a)  $\phi_m$  and  $\phi_N$ , (b)  $\phi_{NM}$  and  $\phi_N$  for the suspensions of  $\phi_{25} = 1.2$  with various  $X_N$  values.

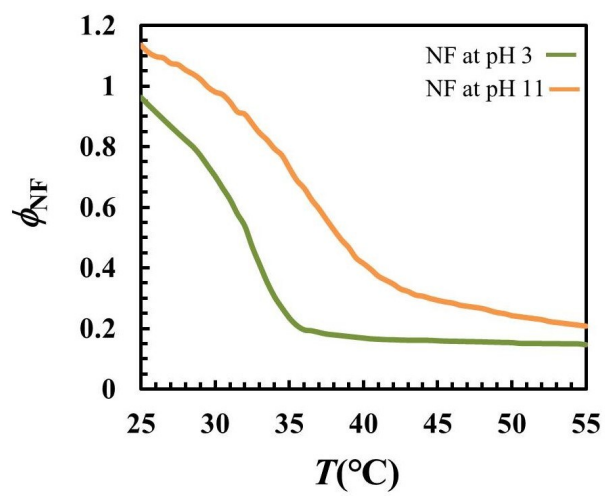

**Supporting Information 2.**  $T$ -dependence of  $\phi_{\text{NF}}$  for the **NF** microgel suspensions of  $\phi_{25} = 0.96$  at pH 3 and  $\phi_{25} = 1.1$  at pH 11.

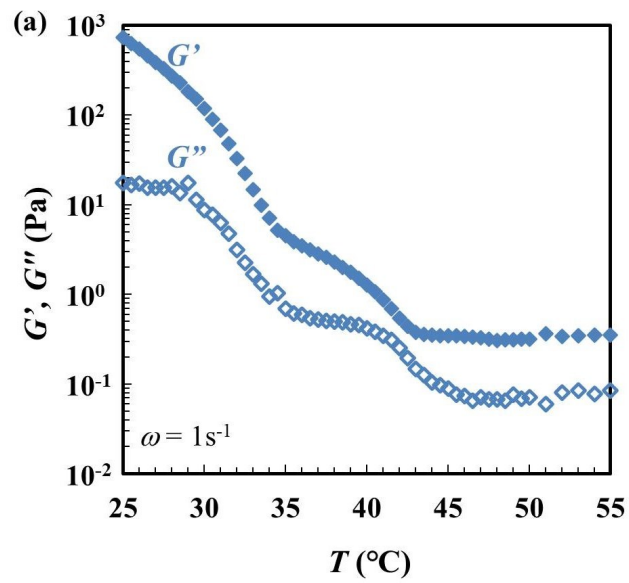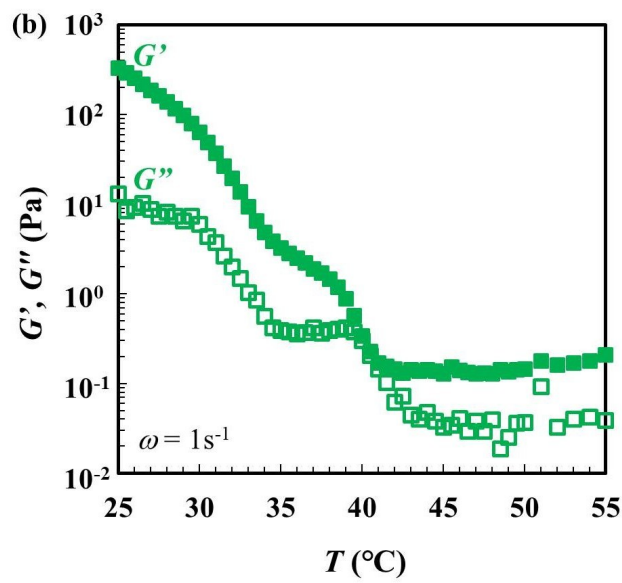

**Supporting Information 3.**  $T$ -dependence of  $G'$  and  $G''$  for the suspensions of (a)  $X_N = 0.8$ ,  $\phi_{25} = 1.2$  and (b)  $X_N = 0.7$ ,  $\phi_{25} = 1.0$ .
